# Supplementary material for: Persistent Presence of Spike protein and Viral RNA in the Circulation of Individuals with Post-Acute Sequelae of COVID-19
Source: bioRxiv or medRxiv preprint supplement (doi:10.1101/2022.08.07.22278520), 2022-08-09
Supplement: Supplementary file [file media-1.pdf]

| <b>Supplementary Table 1: Correlation Analyses of Clinical Characteristics with Viral RNA, Spike level in Plasma and Plasma-derived EVs in COVID-19 Individuals</b> |                                              |                                                 |                                               |
|---------------------------------------------------------------------------------------------------------------------------------------------------------------------|----------------------------------------------|-------------------------------------------------|-----------------------------------------------|
|                                                                                                                                                                     | <b>Viral RNA<br/>[Correlation (p-value)]</b> | <b>Plasma spike<br/>[Correlation (p-value)]</b> | <b>SEVs spike<br/>[Correlation (p-value)]</b> |
| <b>Acutely -infected COVID-19 Cohort</b>                                                                                                                            |                                              |                                                 |                                               |
| <i>Age</i>                                                                                                                                                          | 0.0981 (0.2948)                              | 0.0398 (0.6728)                                 | -0.0061 (0.9597)                              |
| <i>BMI</i>                                                                                                                                                          | 0.04 (0.6695)                                | 0.0809 (0.3898)                                 | -0.2108 (0.0776)                              |
| <i>Peak WHO Score</i>                                                                                                                                               | 0.0497 (0.6026)                              | <b>0.2002 (0.0351) *</b>                        | 0.0716 (0.5646)                               |
| <i>Length of hospitalization</i>                                                                                                                                    | 0.1379 (0.2549)                              | <b>0.253 (0.0359) *</b>                         | 0.1579 (0.324)                                |
| <i>WBC Count</i>                                                                                                                                                    | 0.1009 (0.2856)                              | 0.0567 (0.5508)                                 | 0.1446 (0.2325)                               |
| <i>Lymphocyte Count</i>                                                                                                                                             | -0.133 (0.1806)                              | -0.0676 (0.4995)                                | -0.2072 (0.1031)                              |
| <i>Creatinine</i>                                                                                                                                                   | 0.1477 (0.1153)                              | 0.0055 (0.9536)                                 | 0.0509 (0.6758)                               |
| <i>Lactate Dehydrogenase</i>                                                                                                                                        | <b>0.2532 (0.0273) *</b>                     | 0.1904 (0.0994)                                 | 0.1781 (0.2309)                               |
| <i>Ferritin</i>                                                                                                                                                     | 0.1543 (0.1586)                              | 0.0627 (0.5689)                                 | 0.1888 (0.1892)                               |
| <i>D.Dimer</i>                                                                                                                                                      | 0.0863 (0.4136)                              | <b>0.2338 (0.0249) *</b>                        | <b>0.3544 (0.0092) **</b>                     |
| <i>C-Reactive Protein</i>                                                                                                                                           | 0.1335 (0.2149)                              | 0.1451 (0.1774)                                 | -0.1266 (0.3713)                              |
| <b>Post-Acute Infection Cohort</b>                                                                                                                                  |                                              |                                                 |                                               |
| <i>Age</i>                                                                                                                                                          | 0.0456 (0.761)                               | -0.0231 (0.8774)                                | -0.1102 (0.6343)                              |
| <i>Days between last positive test and study enrollment</i>                                                                                                         | -0.1712 (0.2552)                             | 0.1185 (0.4326)                                 | -0.1635 (0.4789)                              |
| <i>BMI</i>                                                                                                                                                          | 0.0717 (0.6646)                              | -0.1851 (0.2594)                                | -0.1465 (0.5377)                              |
| <i>Length of Hospitalization</i>                                                                                                                                    | <b>0.3338 (0.0435)*</b>                      | -0.1634 (0.3339)                                | 0.442 (0.0581)                                |

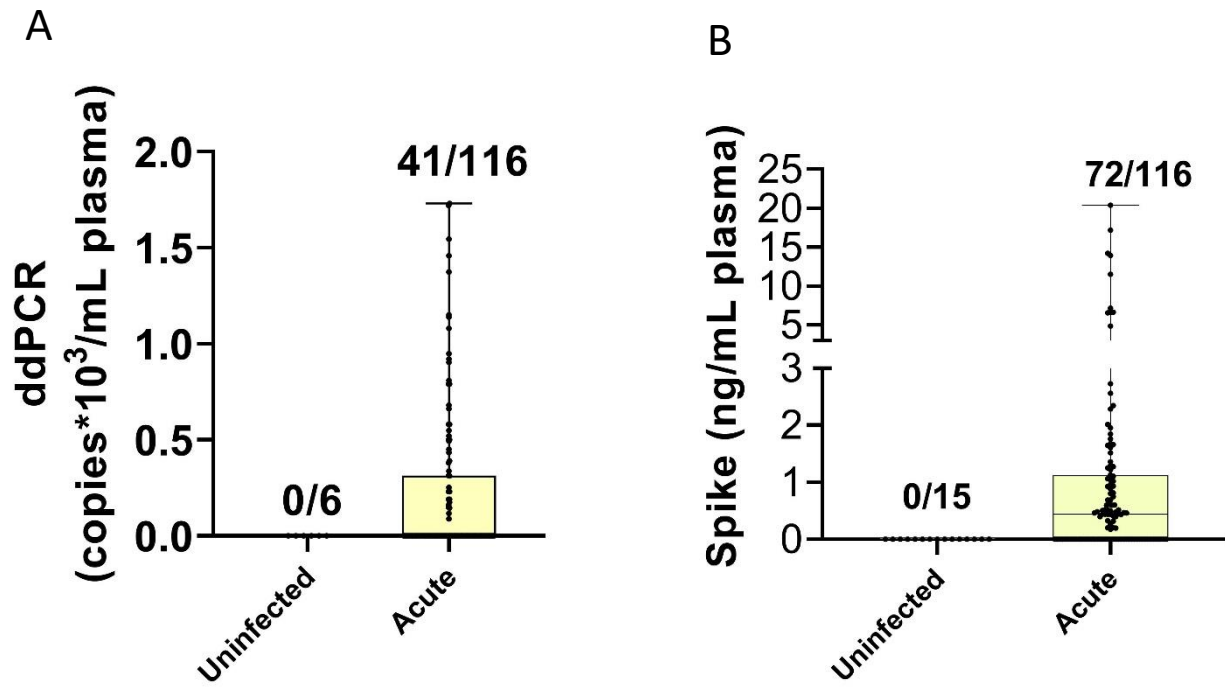

**Supplementary figure 1:** Analysis of SARS-CoV-2 RNA (A) and Spike protein levels (B) in the plasma from *Acute* COVID-19 patients and never infected with COVID-19 controls as measured by dd-PCR and ELISA.
